# Supplementary material for: Evaluating the physiological significance of hypoxic hyperventilation in larval zebrafish (Danio rerio)
Source: Oxford University Press journal article supplement (doi:10.1242/jeb.204800), 2019-01-01
Supplement: jeb204800supp.pdf [file jeb204800supp.pdf]

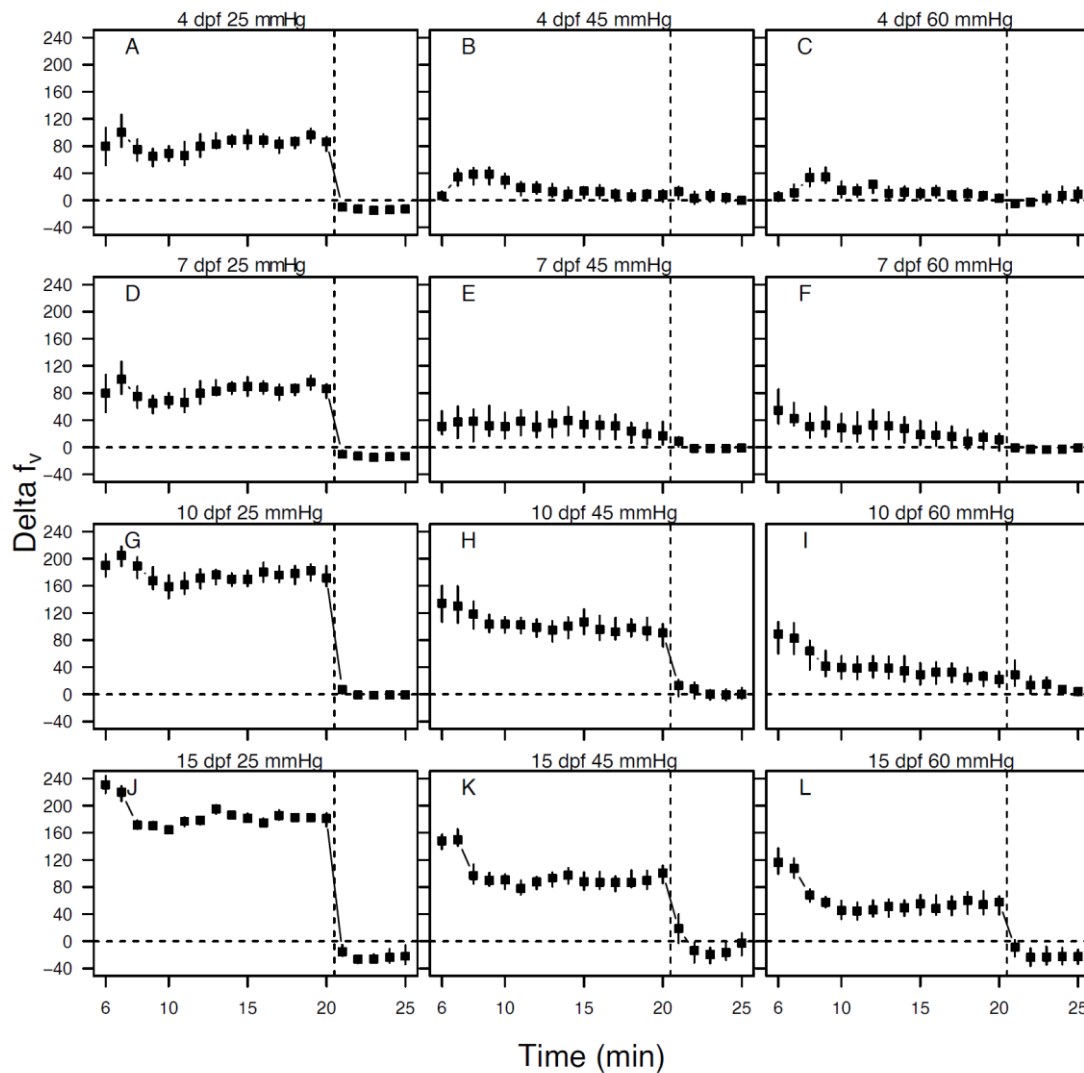

**Figure S1. The average differences in  $f_v$  ( $\Delta f_v$ ) between normoxia and hypoxia, and normoxia and recovery in larval zebrafish (data based on Figure 1).** Larvae at 4 days post fertilization (dpf) (A-C), 7 dpf (D-F), 10 dpf (G-I) and 15 dpf (J-L) were exposed to 25 Torr (A,D,G,J), 45 Torr (B,E,H,K) and 60 Torr (C,F,I,L). Estimates are presented with 95% credible interval based on Bayesian analysis. Each point represents the mode and the 95% CI of the posterior distribution associated with the difference in  $f_v$  of hypoxia and recovery relative to normoxia. Shown are mode (filled squares) and 95% CI (black lines) of the posterior distribution. Data are significant if the 95% CI do not intersect zero (dotted horizontal line).

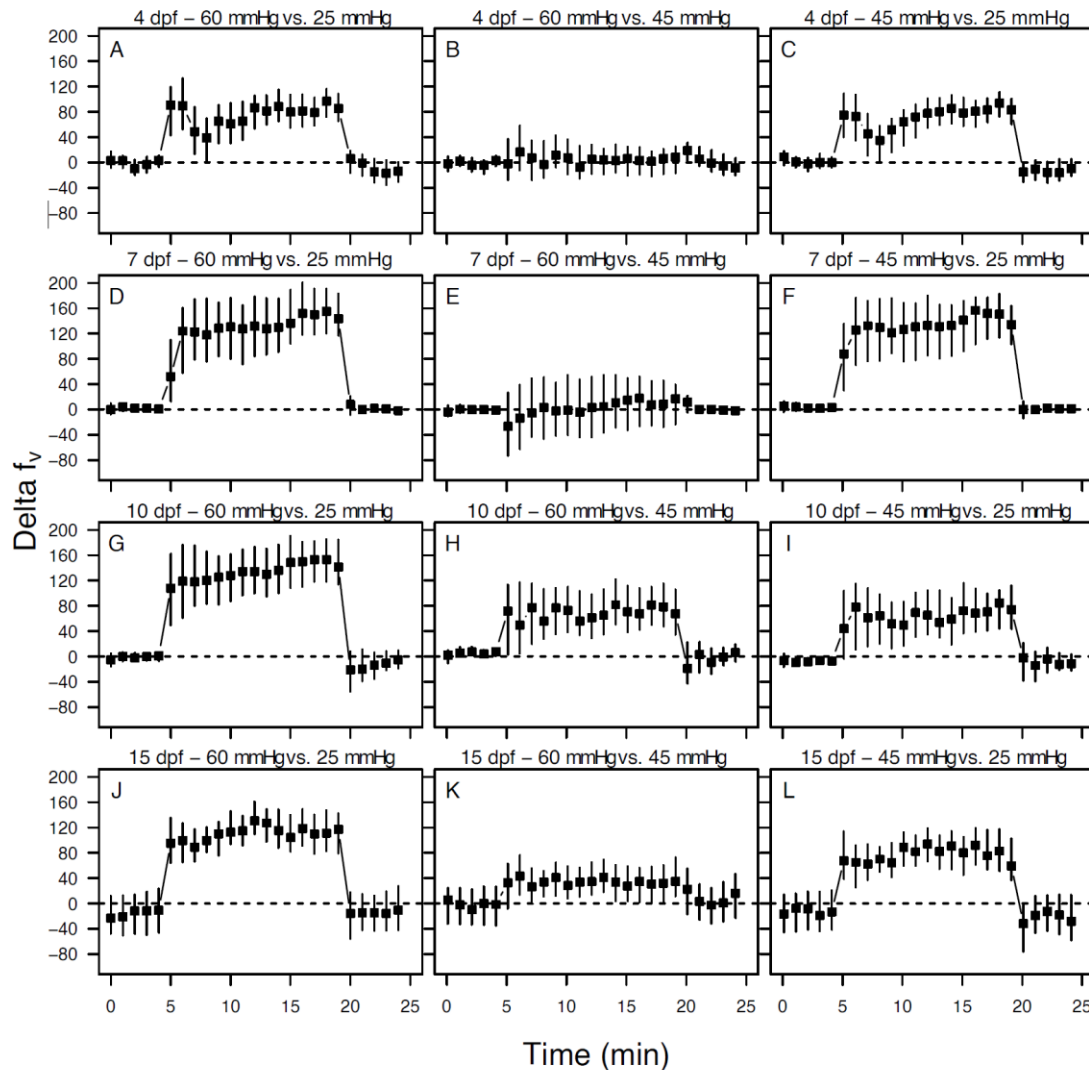

**Figure S2.** The average difference in  $f_v$  ( $\Delta f_v$ ) in larvae at 25 and 45 Torr relative to 60 Torr and at 25 Torr relative to 45 Torr (data based on Figure 1). The larvae are compared at normoxia (5 min), hypoxia (15 min) and recovery (5 min) at 4 days post fertilization (dpf) (A,B,C), 7 dpf (D,E,F), 10 dpf (G,H,I) and 15 dpf (J,K,L). Estimates are presented with 95% credible interval based on Bayesian analysis. Each point represents the mode and the 95% CI of the posterior distribution associated with the difference in  $f_v$  of larvae either at 25 Torr or 45 Torr relative to 60 Torr, or 25 Torr relative to 45 Torr larvae. Shown are mode (filled squares) and 95% CI (black lines) of the posterior distribution. Data are significant if the 95% CI do not intersect zero (dotted horizontal line).

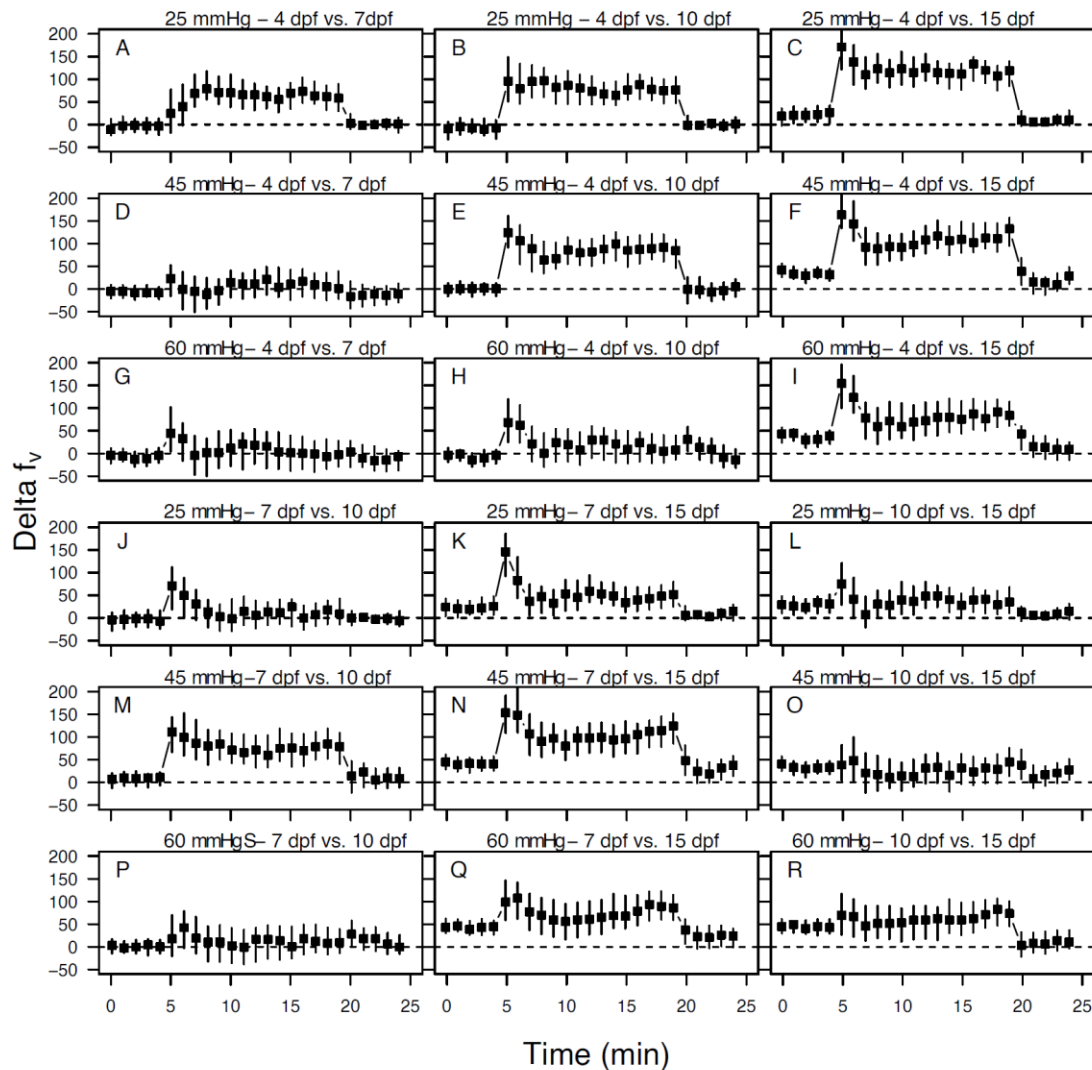

**Figure S3.** The average difference in  $f_v$  ( $\Delta f_v$ ) in larvae at 7, 10 and 15 days post fertilization (dpf) relative to 4 dpf, at 10 and 15 dpf relative to 7 dpf, and at 10 dpf relative to 15 dpf (data based on Figure 1). The larvae are compared at normoxia (5 min), hypoxia (15 min) and recovery (5 min) at 25 Torr (A-C,J-L), 45 Torr (D-F, M-O) and 60 Torr (G-I,P-R). Estimates are presented with 95% credible interval based on Bayesian analysis. Each point represents the mode and the 95% CI of the posterior distribution associated with the difference in  $f_v$  of larvae at different developmental stages relative to 4, 7 or 10 dpf larvae. Shown are mode (filled squares) and 95% CI (black lines) of the posterior distribution. Data are significant if the 95% CI do not intersect zero (dotted horizontal line).

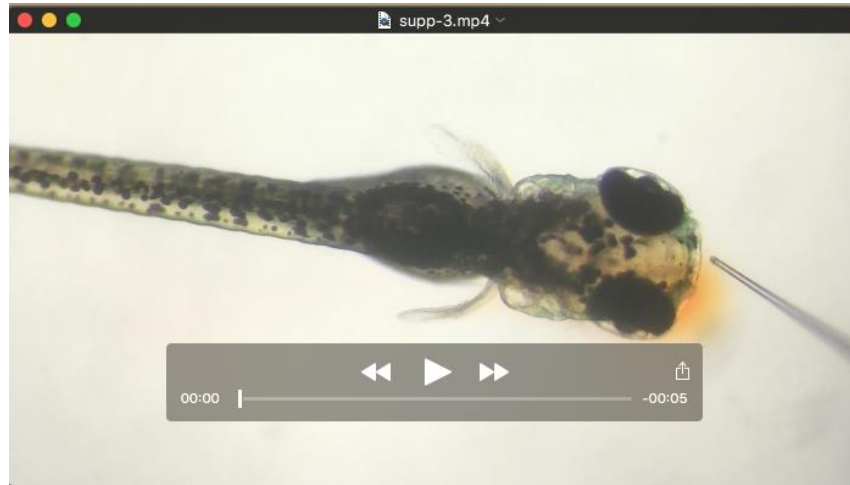

**Movie 1.** 4 dpf zebrafish larva inspiring water from the mouth and expiring water out of the opercula.

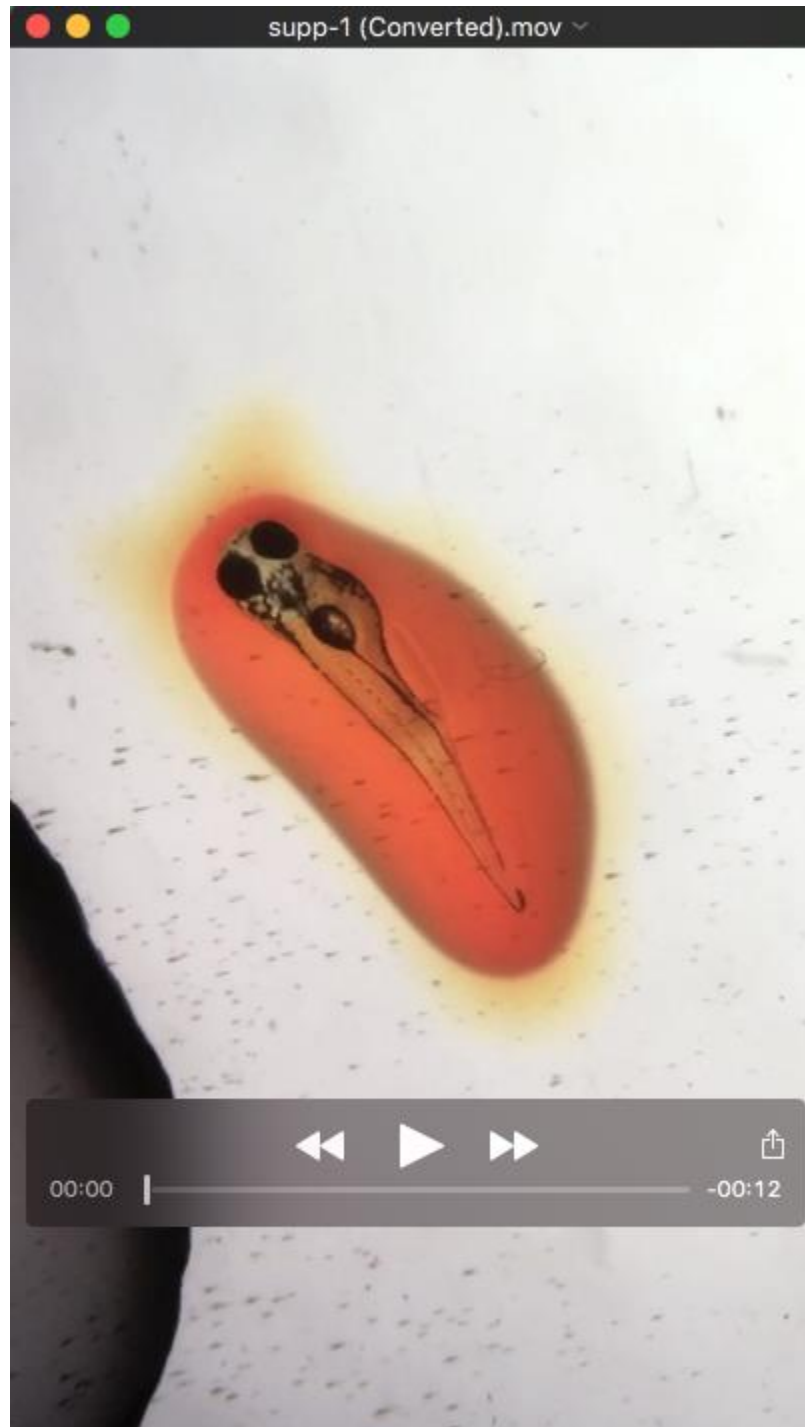

**Movie 2.** 4 dpf larva embedded in 2.5% agar with 0.5% phenol red solution. Once water is added, phenol red quickly diffuses out of the agar.

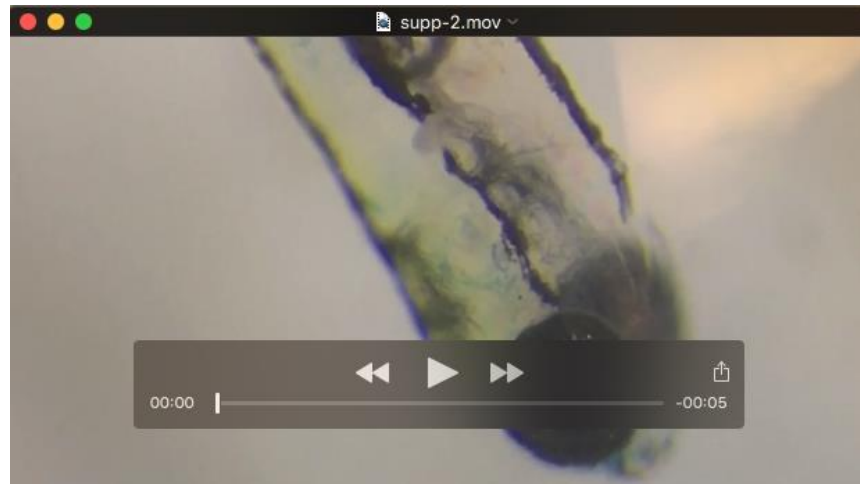

**Movie 3.** 7 dpf larva with its head embedded in 2.5% agar. Ventilation is prevented, but the larva is still able to move its fin.
